# Supplementary material
Source: HighWire-hosted journal article supplement (https://bmjopen.bmj.com/content/11/5/e045888)
Supplement: inline-supplementary-material-1 [file inline-supplementary-material-1.pdf]

**Appendix Tables:**

Table A1- Cohort Selection ICD-10 &amp; OPCS-4.7 Codes

**Table A1: Cohort Selection**

| <b>Category</b>                                                       | <b>ICD-10 / OPCS-4.7</b>                                                                                                                                                           |
|-----------------------------------------------------------------------|------------------------------------------------------------------------------------------------------------------------------------------------------------------------------------|
| <b>Hysterectomies</b>                                                 | Procedures with: Q07.1, Q07.2, Q07.3, Q07.4, Q07.5, Q07.8, Q07.9, Q08.1, Q08.2, Q08.3, Q08.8, Q08.9                                                                                |
| <b>Endometrial/uterine carcinoma or endometrial carcinoma in situ</b> | Patients must have as primary diagnosis: C540, C541, C542, C543, C548, C549, C55X, D070                                                                                            |
| <b>Laparoscopic hysterectomy</b>                                      | Any procedures with one of: Q07.1, Q07.2, Q07.3, Q07.4, Q07.5, Q07.8, Q07.9, Q08.1, Q08.2, Q08.3, Q08.8, Q08.9<br>And with one of: Y75.1, Y75.2, Y75.5, Y75.8, Y75.9, T43.9        |
| <b>Robotic hysterectomy</b>                                           | Any procedures with one of: Q07.1, Q07.2, Q07.3, Q07.4, Q07.5, Q07.8, Q07.9, Q08.1, Q08.2, Q08.3, Q08.8, Q08.9<br>And with one of: Y75.3                                           |
| <b>Open hysterectomy</b>                                              | Any procedures with one of: Q07.1, Q07.2, Q07.3, Q07.4, Q07.5, Q07.8, Q07.9<br>And without any: Y75.1, Y75.2, Y75.5, Y75.8, Y75.9, T43.9 Y75.3                                     |
| <b>Vaginal hysterectomy</b>                                           | Any procedures with one of: Q08.1, Q08.2, Q08.3, Q08.8, Q08.9<br>And without any: Y75.1, Y75.2, Y75.5, Y75.8, Y75.9, T43.9 Y75.3                                                   |
| <b>Minimally Invasive Surgery</b>                                     | Any procedures with one of: Q07.1, Q07.2, Q07.3, Q07.4, Q07.5, Q07.8, Q07.9, Q08.1, Q08.2, Q08.3, Q08.8, Q08.9<br>And with one of: Y75.1, Y75.2, Y75.5, Y75.8, Y75.9, T43.9, Y75.3 |

Table A2 – Other complications OPCS-4.7 codes assessed

**Table A2: Complication classification<sup>a</sup>**

| Category                              | ICD-10 / OPCS-4.7                                                                                                                                                                                               |
|---------------------------------------|-----------------------------------------------------------------------------------------------------------------------------------------------------------------------------------------------------------------|
| <b>Gastrointestinal complications</b> | A090 I898 K228 K250 K252 K254 K256 K260 K261 K262 K264 K265 K266<br>K270 K272 K274 K276 K280 K282 K284 K286 K290 K450 K560 K565 K566 K567 K625 K631 K638 K660 K720 K729 K85 K913 K918<br>K919 K92 S360 K61 N824 |
| <b>Wounds</b>                         | D649 K603 K604 K605 K632 K829 K832 L89 T813 T815 T343 T453 T793                                                                                                                                                 |
| <b>Infections</b>                     | A40 A41 A49 B95 B96 K630 K65 L03 L04 N10 N12 N151 N159 N300 N309 N390 R788 T793 T802 T814 T816 T827 T836 T857                                                                                                   |
| <b>Uteric Injury Complication</b>     | N133 N139 N17 N19 N280 N312 N990 N991 N998 N999 R32 R33 S360 N12 N151 N159 N300 N309 N390 N360 S371 N131 N821                                                                                                   |
| <b>Haemorrhage</b>                    | T810 S35 D65                                                                                                                                                                                                    |
| <b>Cardiovascular disorders</b>       | I21 I46 I48 I49 I50 I74 I80 I81 I82 I950 I952 I959 I978<br>I979 R57 T801 T811 T817 T827                                                                                                                         |
| <b>Pulmonary complications</b>        | J80 J81 J90 J91 J93 J955 J958 J959 J960 J969 J981 R060 R09 I26 J100 J110 J12 J13 J14 J15 J16 J17 J18 J690 J85 J86                                                                                               |
| <b>Neurological disorders</b>         | F05 F13 F15 F19 G45 G46 G569 G81 G82 G83 G931 G936 G970 G971 G978 G979 I63 I65                                                                                                                                  |
| <b>Other</b>                          | T882 T790 T800 E15 E272 E86 E87 R798 T812 T818 T888 T792                                                                                                                                                        |

<sup>a</sup> Adapted from Ma C, et al. Postoperative complications following colectomy for ulcerative colitis: A validation study. BMC Gastroenterol 2012; 12:39.

Table A3: Cancer Treatment OPCS 4.7 Codes excluded for cost analysis

| Category     | Specific Code                                              | Sub Category                                                                                               |
|--------------|------------------------------------------------------------|------------------------------------------------------------------------------------------------------------|
| Chemotherapy | X70.1                                                      | Procurement of drugs for chemotherapy for neoplasm for regimens in Band 1                                  |
|              | X70.2                                                      | Procurement of drugs for chemotherapy for neoplasm for regimens in Band 2                                  |
|              | X70.3                                                      | Procurement of drugs for chemotherapy for neoplasm for regimens in Band 3                                  |
|              | X70.4                                                      | Procurement of drugs for chemotherapy for neoplasm for regimens in Band 4                                  |
|              | X70.5                                                      | Procurement of drugs for chemotherapy for neoplasm for regimens in Band 5                                  |
|              | X70.8                                                      | Other specified procurement of drugs for chemotherapy for neoplasm in Bands 1-5                            |
|              | X70.9                                                      | Unspecified procurement of drugs for chemotherapy for neoplasm in Bands 1-5                                |
|              | X71.1                                                      | Procurement of drugs for chemotherapy for neoplasm for regimens in Band 6                                  |
|              | X71.2                                                      | Procurement of drugs for chemotherapy for neoplasm for regimens in Band 7                                  |
|              | X71.3                                                      | Procurement of drugs for chemotherapy for neoplasm for regimens in Band 8                                  |
|              | X71.4                                                      | Procurement of drugs for chemotherapy for neoplasm for regimens in Band 9                                  |
|              | X71.5                                                      | Procurement of drugs for chemotherapy for neoplasm for regimens in Band 10                                 |
|              | X71.8                                                      | Other specified procurement of drugs for chemotherapy for neoplasm in Bands 6-10                           |
|              | X71.9                                                      | Unspecified procurement of drugs for chemotherapy for neoplasm in Bands 6-10                               |
|              | X72.1                                                      | Delivery of complex chemotherapy for neoplasm including prolonged infusional treatment at first attendance |
|              | X72.2                                                      | Delivery of complex parenteral chemotherapy for neoplasm at first attendance                               |
|              | X72.3                                                      | Delivery of simple parenteral chemotherapy for neoplasm at first attendance                                |
|              | X72.4                                                      | Delivery of subsequent element of cycle of chemotherapy for neoplasm                                       |
|              | X72.8                                                      | Other specified delivery of chemotherapy for neoplasm                                                      |
|              | X72.9                                                      | Unspecified delivery of chemotherapy for neoplasm                                                          |
|              | X73.1                                                      | Delivery of exclusively oral chemotherapy for neoplasm                                                     |
|              | X73.8                                                      | Other specified delivery of oral chemotherapy for neoplasm                                                 |
|              | X73.9                                                      | Unspecified delivery of oral chemotherapy for neoplasm                                                     |
|              | X74.1                                                      | Cancer hormonal treatment drugs Band 1                                                                     |
|              | X74.2                                                      | Cancer supportive drugs Band 1                                                                             |
|              | X74.8                                                      | Other specified other chemotherapy drugs                                                                   |
|              | X74.9                                                      | Unspecified other chemotherapy drugs                                                                       |
| Radiotherapy | X65.1                                                      | Delivery of a fraction of total body irradiation                                                           |
|              | X65.2                                                      | Delivery of a fraction of intracavitary radiotherapy                                                       |
|              | X65.3                                                      | Delivery of a fraction of interstitial radiotherapy                                                        |
|              | X65.4                                                      | Delivery of a fraction of external beam radiotherapy NEC                                                   |
|              | X65.5                                                      | Oral delivery of radiotherapy for thyroid ablation                                                         |
|              | X65.6                                                      | Delivery of a fraction of intraluminal brachytherapy                                                       |
|              | X65.7                                                      | Delivery of radionuclide therapy NEC                                                                       |
|              | X65.8                                                      | Other specified radiotherapy delivery                                                                      |
|              | X65.9                                                      | Unspecified radiotherapy delivery                                                                          |
|              | X67.1                                                      | Preparation for intensity modulated radiation therapy                                                      |
|              | X67.2                                                      | Preparation for total body irradiation                                                                     |
|              | X67.3                                                      | Preparation for hemi body irradiation                                                                      |
|              | X67.4                                                      | Preparation for simple radiotherapy with imaging and dosimetry                                             |
|              | X67.5                                                      | Preparation for simple radiotherapy with imaging and simple calculation                                    |
|              | X67.6                                                      | Preparation for superficial radiotherapy with simple calculation                                           |
|              | X67.7                                                      | Preparation for complex conformal radiotherapy                                                             |
| X67.8        | Other specified preparation for external beam radiotherapy |                                                                                                            |

|               |       |                                                                                      |
|---------------|-------|--------------------------------------------------------------------------------------|
|               | X67.9 | Unspecified preparation for external beam radiotherapy                               |
|               | Y92.1 | Technical support for preparation for radiotherapy                                   |
|               | Y92.2 | Other specified support for preparation for radiotherapy                             |
|               | Y92.3 | Unspecified support for preparation for radiotherapy                                 |
| Brachytherapy | X68.1 | Preparation for intraluminal brachytherapy                                           |
|               | X68.2 | Preparation for intracavitary brachytherapy                                          |
|               | X68.3 | Preparation for interstitial brachytherapy                                           |
|               | X68.8 | Other specified preparation for brachytherapy                                        |
|               | X68.9 | Unspecified preparation for brachytherapy                                            |
|               | Y35.4 | Introduction of radioactive substance into organ for brachytherapy NOC               |
|               | Y36.4 | Introduction of non-removable radioactive substance into organ for brachytherapy NOC |
|               | Y89.1 | High dose rate brachytherapy treatment                                               |
|               | Y89.2 | Pulsed dose rate brachytherapy treatment                                             |
|               | Y89.8 | Other specified brachytherapy                                                        |
|               | Y89.9 | Unspecified brachytherapy                                                            |
